# Supplementary material
Source: PubMed Central journal article supplement (PMC4066227)
Supplement: Supp_Fig1.pdf [file Supp_Fig1.pdf]

## Supplementary Data

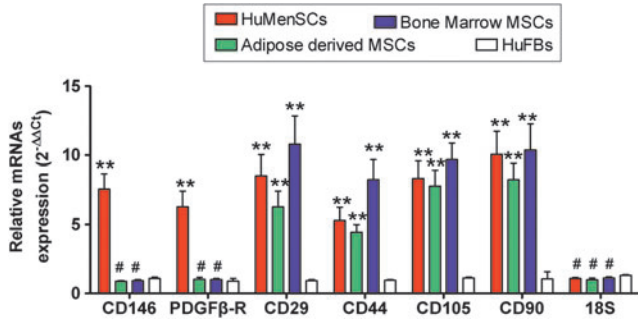

**SUPPLEMENTARY FIG. S1.** The mRNA expression levels of MSC markers on HuMenSCs, Adipose-derived MSCs, bone marrow MSCs, and HuFBs were tested by qRT-PCR. The qRT-PCR results showed that expression levels of the mesenchymal stem cell biomarkers CD29, CD44, CD90, and CD105 were approximately eight-fold higher not only in HuMenSCs, but also in adipose-derived MSCs, bone marrow MSCs than in the HuFBs (\*\* $P < 0.01$  vs. HuFBs; # $P > 0.05$  vs. HuFBs;  $n = 3$ ). However, only in HuMenSCs, the expression levels of the endometrial cell markers CD146 and PDGFβ-R elevated than other MSCs and HuFBs (\*\* $P < 0.01$  vs. HuFBs; # $P > 0.05$  vs. HuFBs;  $n = 3$ ). HuFBs, human fibroblasts; HuMenSCs, human endometrial stem cells; qRT-PCR real-time quantitative reverse transcription (PCR).
